# Supplementary material
Source: PubMed Central journal article supplement (PMC1142539)

**A**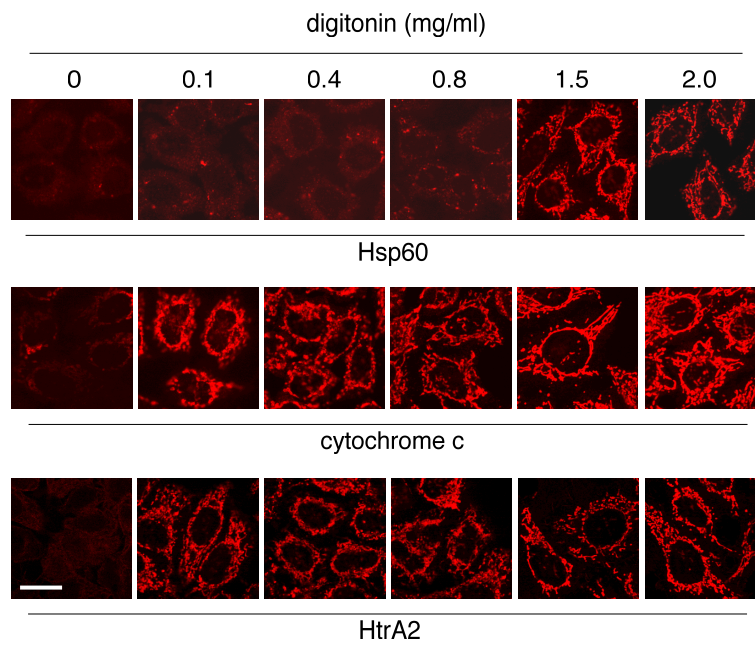**B**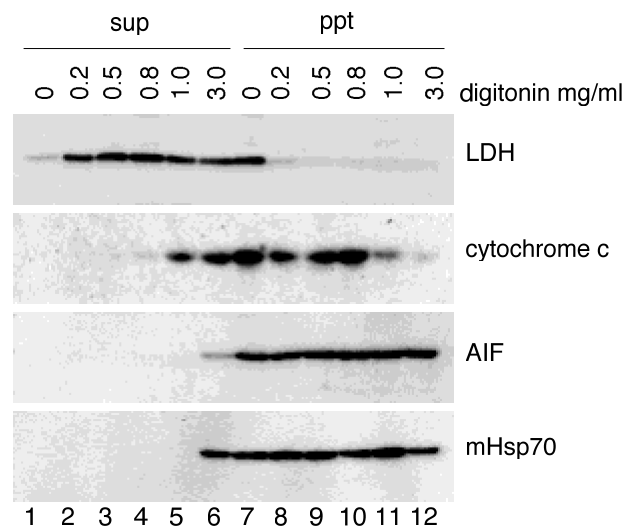

Supplemental Figure 1 (Otera *et al*)

Supplement: 7600614s2.pdf [file 7600614s2.pdf]

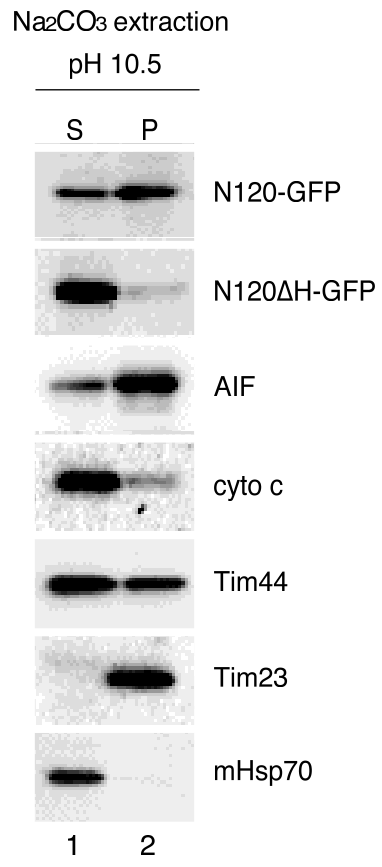

Supplemental Figure 2 (*Otera et al*)

Supplement: 7600614s3.pdf [file 7600614s3.pdf]

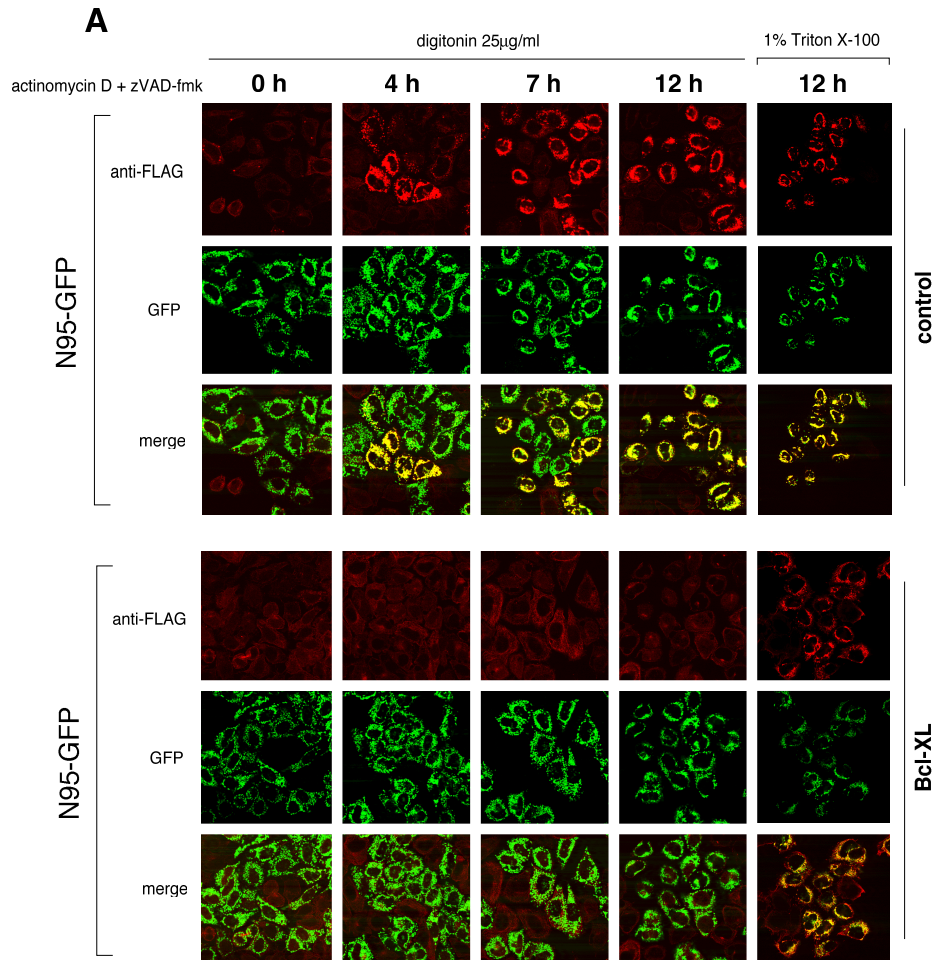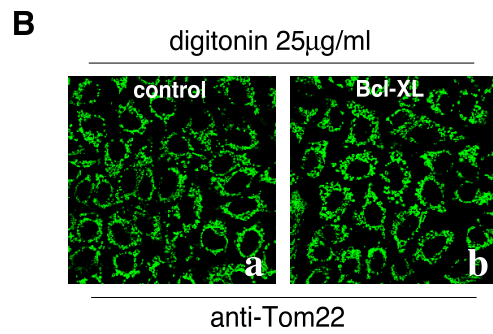

Supplemental Figure 3 (Otera et al)

Supplement: 7600614s4.pdf [file 7600614s4.pdf]
